# Supplementary material for: RNA-mediated control of cell shape modulates antibiotic resistance in Vibrio cholerae
Source: PubMed Central journal article supplement (PMC7695739; doi:10.1038/s41467-020-19890-8), 2020-11-27
Supplement: 41467_2020_19890_MOESM1_ESM.pdf [file 41467_2020_19890_MOESM1_ESM.pdf]

**RNA-mediated control of cell shape modulates  
antibiotic resistance in *Vibrio cholerae***

Nikolai Peschek<sup>1,2\*</sup>, Roman Herzog<sup>1,2\*</sup>, Praveen K. Singh<sup>3\*</sup>, Marcel Sprenger<sup>1\*</sup>, Fabian Meyer<sup>2,4</sup>, Kathrin S. Fröhlich<sup>1,2</sup>, Luise Schröger<sup>2</sup>, Marc Bramkamp<sup>2,4</sup>, Knut Drescher<sup>3,5</sup>, and Kai Papenfort<sup>1,2,6#</sup>

<sup>1</sup> Friedrich Schiller University, Institute of Microbiology, 07745 Jena, Germany

<sup>2</sup> Faculty of Biology I, Ludwig-Maximilians-University of Munich, 82152 Martinsried, Germany

<sup>3</sup> Max Planck Institute for Terrestrial Microbiology, 35043 Marburg, Germany

<sup>4</sup> Institute for General Microbiology, Christian-Albrechts-University, Kiel, Germany,

<sup>5</sup> Department of Physics, Philipps-Universität Marburg, 35032 Marburg, Germany

<sup>6</sup> Microverse Cluster, Friedrich Schiller University Jena, 07743 Jena, Germany.

\* These authors contributed equally

# Corresponding author:

Kai Papenfort

E-mail: kai.papenfort@uni-jena.de

Phone: +49-3641-949311

**This supplement contains:**

Supplementary Figures 1-7

Supplementary Materials and Methods

Supplementary Tables 1-4

Supplemental References

## TABLE OF CONTENTS

|                             |                                                                                                                                            |
|-----------------------------|--------------------------------------------------------------------------------------------------------------------------------------------|
| <b>Supplementary Fig. 1</b> | Structure and transcriptional control of the VadR sRNA                                                                                     |
| <b>Supplementary Fig. 2</b> | RNA-seq target validation and VadR-mediated regulation of RbmA                                                                             |
| <b>Supplementary Fig. 3</b> | Potential VadR target genes and expression of VadR variants                                                                                |
| <b>Supplementary Fig. 4</b> | VadR does not affect the length and area of <i>V. cholerae</i> cells                                                                       |
| <b>Supplementary Fig. 5</b> | The VadR promoter responds to A22 treatment and <i>V. cholerae</i> depends on tight <i>crvA</i> regulation to overcome Penicillin G stress |
| <b>Supplementary Fig. 6</b> | Microscopic analysis of <i>V. cholerae</i> cells using HADA labelling.                                                                     |
| <b>Supplementary Fig. 7</b> | Conservation of VadR targets genes among different <i>Vibrio</i> species.                                                                  |

## Supplementary Materials and Methods

|                              |                                         |
|------------------------------|-----------------------------------------|
| <b>Supplementary Table 1</b> | VadR RNA-seq                            |
| <b>Supplementary Table 2</b> | Bacterial strains used in this study    |
| <b>Supplementary Table 3</b> | Plasmids used in this study             |
| <b>Supplementary Table 4</b> | DNA oligonucleotides used in this study |

**Supplementary Figures**

**Supplementary Figure 1**

**a**

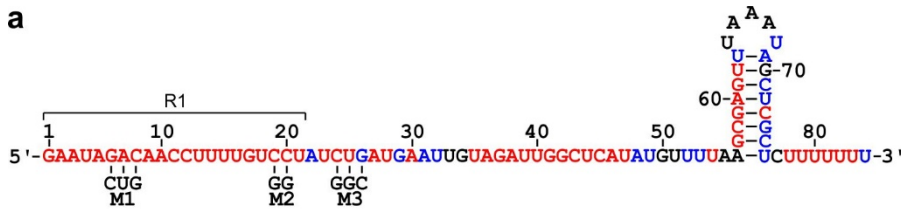

**b**

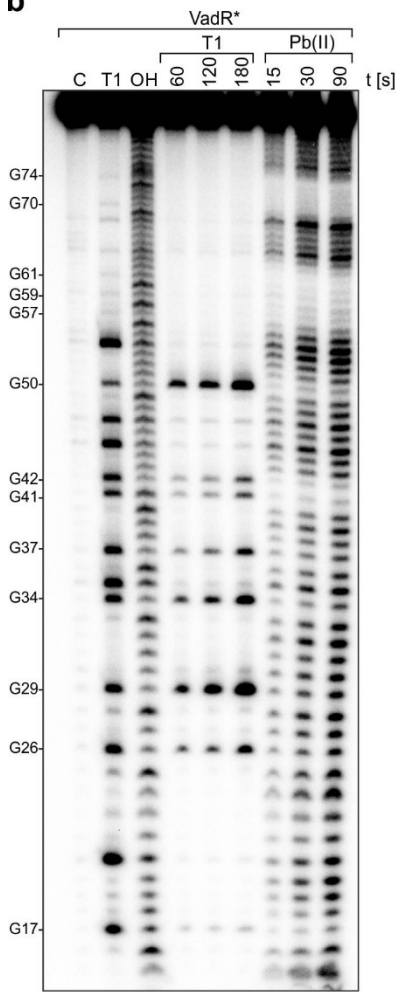

**c**

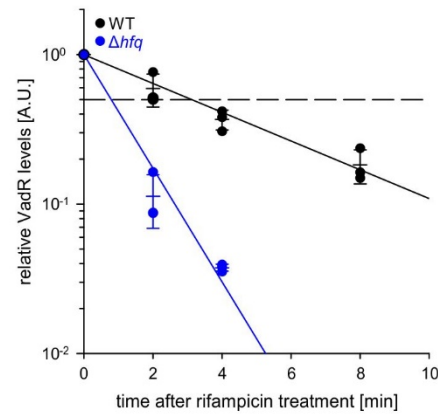

**d**

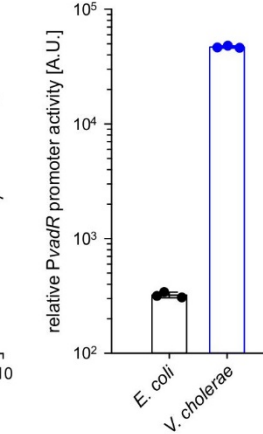

**e**

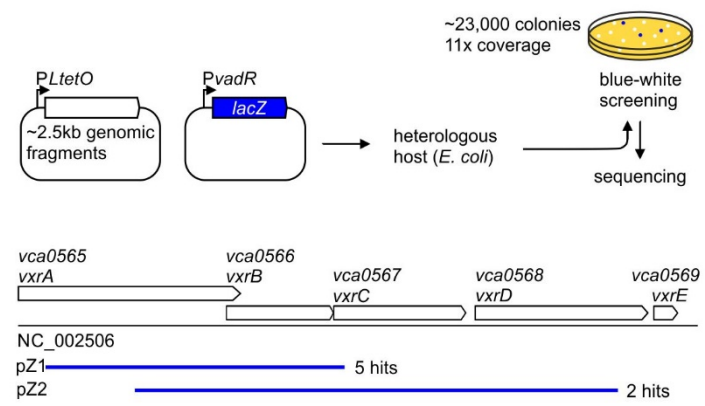

**f**

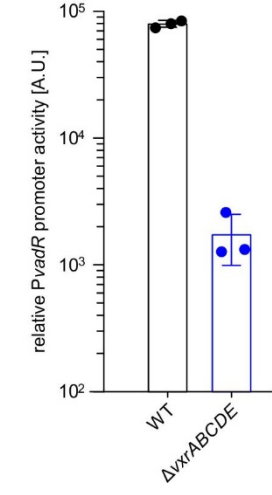

**g**

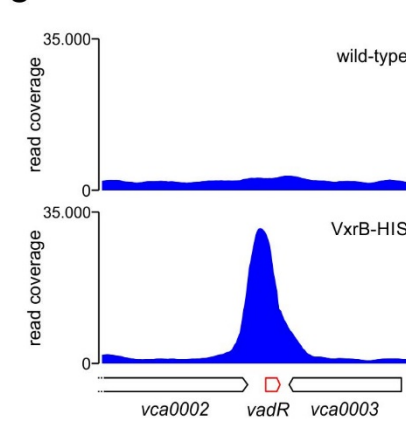

**h**

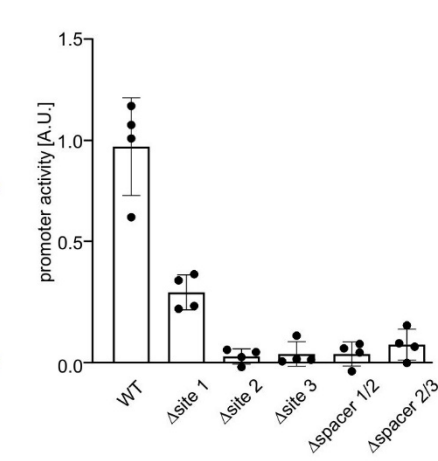

### Supplementary Figure 1: Structure and transcriptional control of the VadR sRNA

**a** The secondary structure of the VadR sRNA predicted by structure probing experiments (b).

**b** Secondary structure probing of the VadR sRNA. VadR was synthesized *in vitro* and labelled with  $^{32}\text{P}$ . Enzymatic treatment was performed using RNase T1, or lead-acetate (Pb(II)). The untreated control is labelled with C, denatured ladders for RNase T1 and alkaline ladder are provided and labelled with T1 and OH, respectively. Guanin residues are labelled on the left side. The experiment was done in two biological replicates.

**c** Rifampicin treatment to determine half-life of the VadR sRNA, in wild-type or *hfq* mutant strains. The dashes represent the mean of biologically independent replicates  $\pm$  SD,  $n = 3$ .

**d** VadR promoter activities in *E. coli* and *V. cholerae* cultures grown for 16h in LB were determined using a fluorescent transcriptional reporter. Data are the mean of biologically independent replicates  $\pm$  SD,  $n = 3$ .

**e** Upper part: Experimental outline to identify transcription factors affecting *vadR* transcription. Lower part: Identified fragments that yielded blue colonies.

**f** *V. cholerae* wild-type and *vxrABCDE* mutant strains were grown to  $\text{OD}_{600} = 0.5$  and VadR promoter activities were measured. Bars show the mean of biologically independent replicates  $\pm$  SD,  $n = 3$ .

**g** ChIP-seq data from *V. cholerae* wild-type and *vxB-HIS* strains, which were treated with penicillin G for 3 h<sup>1</sup>. Data was re-analyzed and read coverages for the *vadR* genomic locus were plotted.

**h** Three putative VxB binding sites and the spacer between the binding sites 1/2 and 2/3 in the promoter region of *vadR* were deleted. The resulting strains and *V. cholerae* wild-type were cultivated to  $\text{OD}_{600} = 1.0$  and assayed for *vadR* promoter activities using a fluorescent transcriptional reporter. Bars represent the mean of biologically independent replicates  $\pm$  SD,  $n = 4$ . The mean of wild-type cells was set to 1. Source data underlying panels **b**, **c**, **d**, **f** and **h** are provided as a Source Data file.

## Supplementary Figure 2

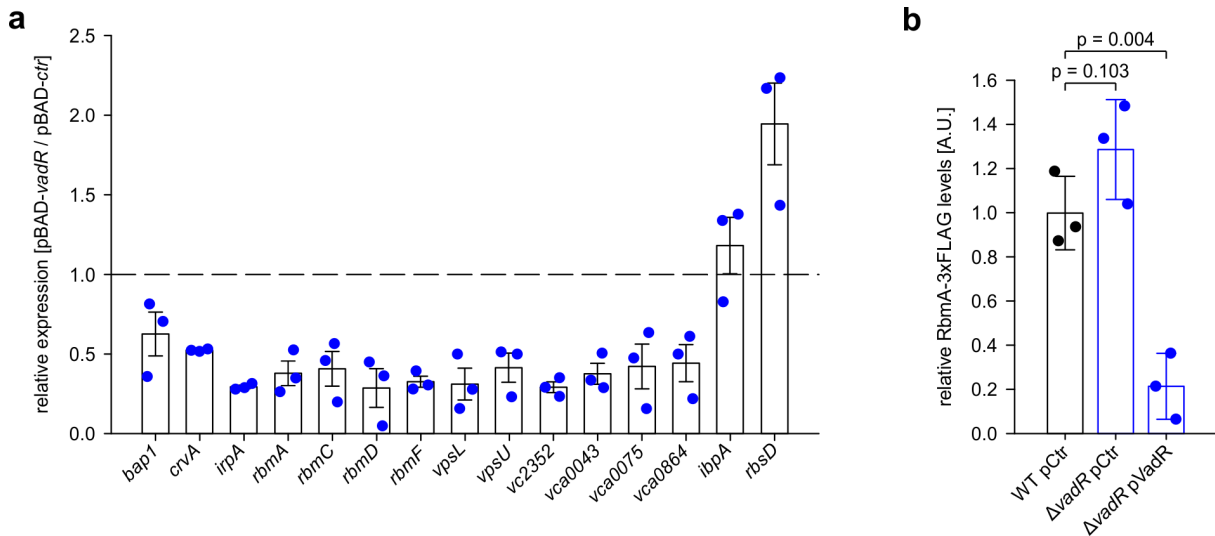

### Supplementary Figure 2: RNA-seq target validation and VadR-mediated regulation of RbmA

**a** qRT-PCR analysis after short period VadR expression. Expression was calculated relative to an empty vector control (pBAD-ctr). Bars represent mean of biologically independent replicates  $\pm$  SEM,  $n = 3$ .

**b** Western analysis of RbmA-3xFLAG levels in *V. cholerae* wild-type and *vadR* mutant strains carrying either an empty control plasmid (pCtr) or a constitutive *vadR* overexpression plasmid. Cells were grown at 30 °C without agitation. Whole cell protein fractions were harvested at  $OD_{600} = 0.4$ . Bars indicate mean of biologically independent replicates  $\pm$  SD,  $n = 3$ . Statistical significance was determined using one-way ANOVA and post-hoc Holm-Sidak test. Source data underlying panels **a** and **b** are provided as a Source Data file.

### Supplementary Figure 3

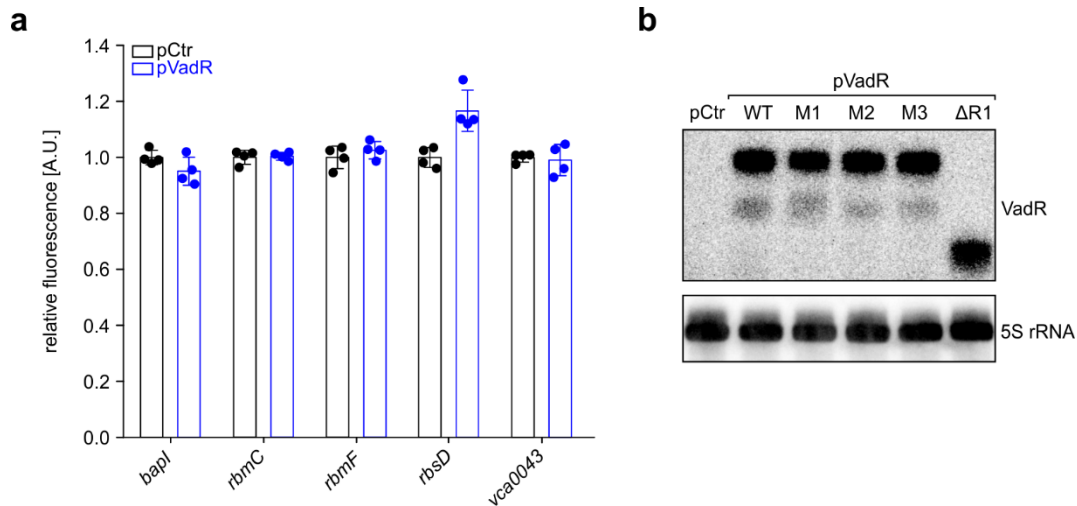

### Supplementary Figure 3: Potential VadR target genes and expression of VadR variants

**a** VadR target genes that do not display post-transcriptional regulation in *E. coli*. Fluorescence intensities of *E. coli* strains carrying the gene-specific reporter and the control plasmid (pCtr) were set to 1. Bars show mean of biologically independent replicates  $\pm$  SD,  $n = 4$ .

**b** Northern analysis confirms similar expression levels of all plasmid-borne VadR variants used in this study. RNA was obtained from *E. coli* cells at  $OD_{600} = 1.0$ , which were overexpressing the indicated *vadR* variants. The experiment was done in two biological replicates. Source data underlying panels **a** and **b** are provided as a Source Data file.

## Supplementary Figure 4

**a**

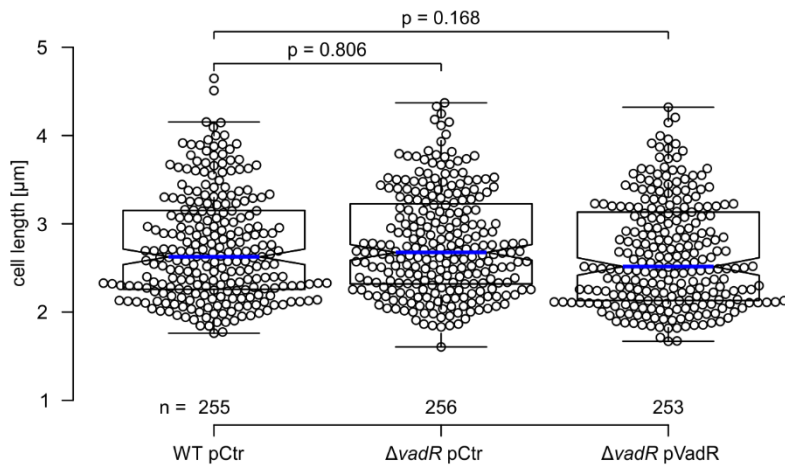

**b**

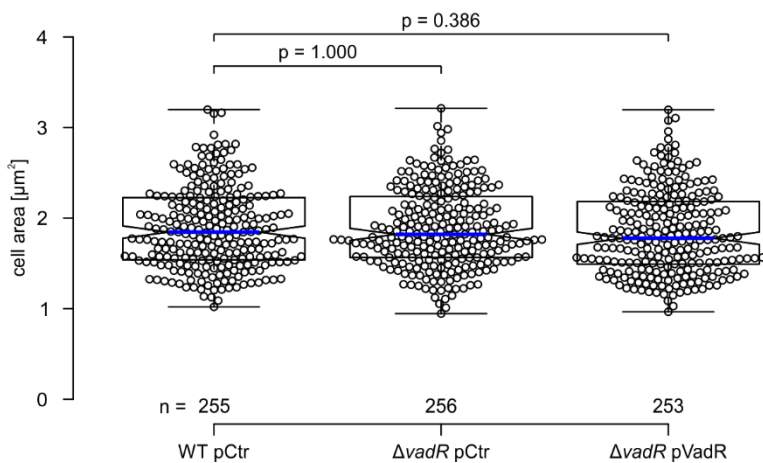

### Supplementary Figure 4: VadR does not affect the length and area of *V. cholerae* cells

**a-b** Analysis of cell length (**a**) and cell area (**b**) in  $-Cef$  samples of Fig. 4b. A blue line indicates the median, boxes represent 25<sup>th</sup> and 75<sup>th</sup> percentiles, whiskers represent 5<sup>th</sup> and 95<sup>th</sup> percentiles and notches indicate 95% confidence intervals for each median.  $n$  of each set is listed above the x-axis over three independent experiments. Statistical significance was determined using one-sided Kruskal-Wallis test and post-hoc Dunn's test. Source data underlying panels **a** and **b** are provided as a Source Data file.

## Supplementary Figure 5

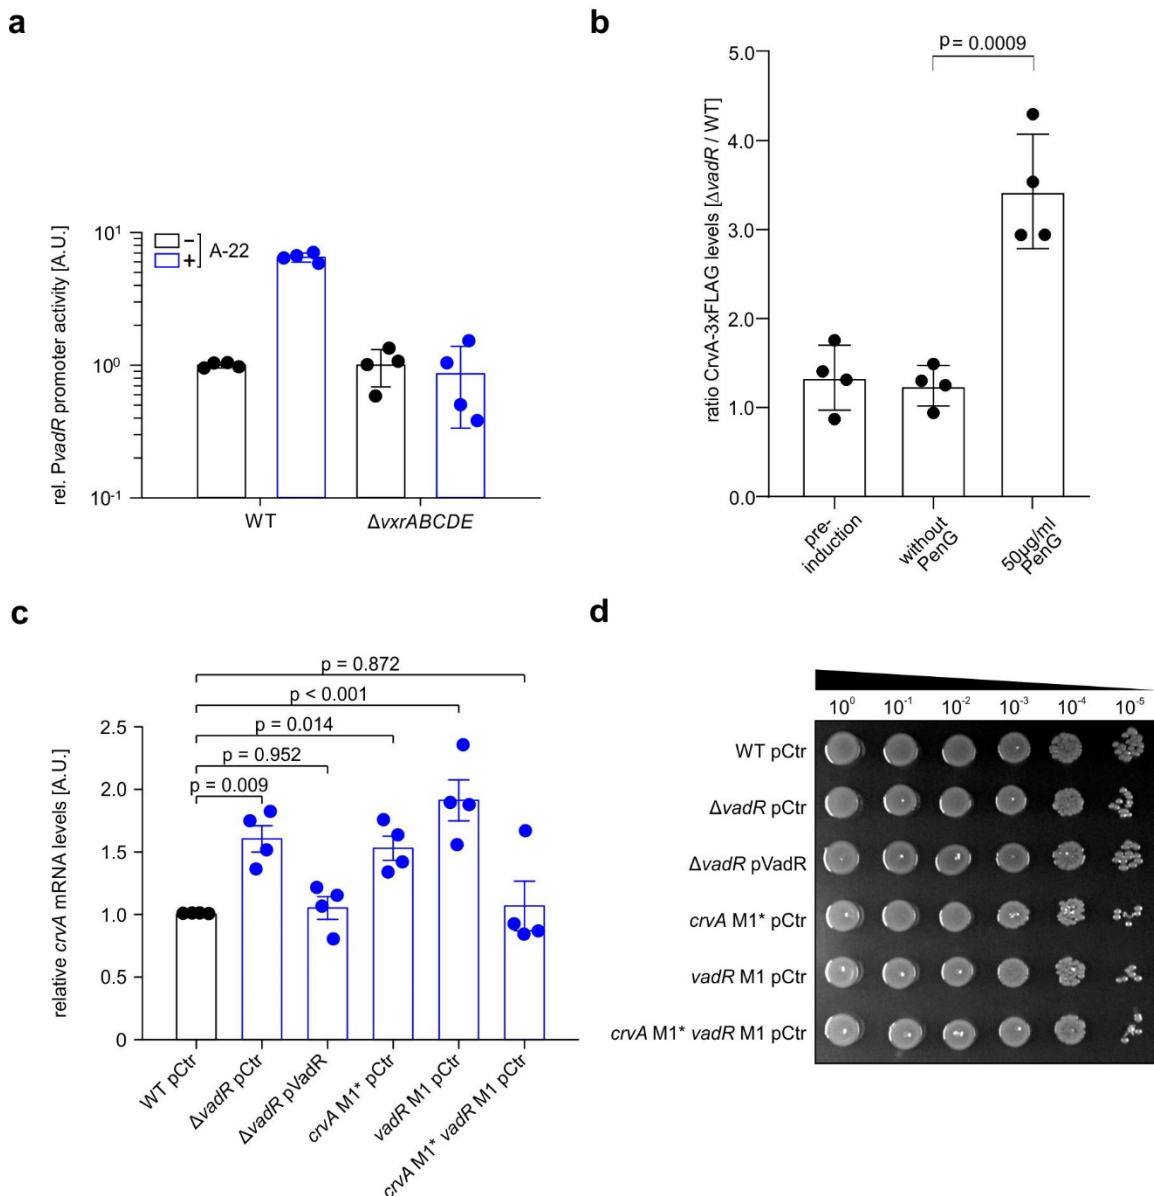

### Supplementary Figure 5: The VadR promoter responds to A22 treatment and *V. cholerae* depends on tight *crvA* regulation to overcome Penicillin G stress

**a** *V. cholerae* wild-type and *vxrABCDE* mutant strains were grown to  $OD_{600} = 0.2$ . Cultures were split and one set was treated with A-22 (10  $\mu g/ml$  final conc.), while the other set received the same volume of water as mock treatment. VadR promoter activities in both sets were measured after 3h using a fluorescent transcriptional reporter. Promoter activities of mock-treated strains were set to 1. Bars represent mean of biologically independent replicates  $\pm$  SD,  $n = 4$ .

**b** Quantification of CrvA-3xFLAG protein levels in *V. cholerae* wild-type and *vadR*-deficient cells. Strains were grown to an  $OD_{600}$  of 0.2 (pre-induction), cultures were split, and one set was treated with penicillin G (50  $\mu g mL^{-1}$  final conc.) for 3h. Total protein samples of the indicated strains were harvested and tested by Western blot analysis. CrvA-3xFLAG protein



levels in  $\Delta vadR$  were normalized to wild-type levels. Bars show mean of biologically independent replicates  $\pm$  SD,  $n = 4$ . Statistical significance was determined using one-way ANOVA and post-hoc Sidak tests.

**c** The indicated *V. cholerae* strains (x-axis) were grown to an  $OD_{600}$  of 0.2 and treated with penicillin G ( $50 \mu\text{g mL}^{-1}$  final conc.) for 30 min. Total RNA was isolated and analyzed for *crvA* expression by qRT-PCR. Bars represent mean of biologically independent replicates  $\pm$  SEM,  $n = 4$ , relative to *V. cholerae* wild-type. Statistical significance was determined using  $\log_{10}$ -transformed values for one-way ANOVA and post-hoc Holm-Sidak test.

**d** The indicated *V. cholerae* strains (y-axis) were grown to  $OD_{600} = 0.4 + 3 \text{ h}$  and assayed for CFUs by spotting serial dilutions on agar plates. Source data underlying panels **a-d** are provided as a Source Data file.

## Supplementary Figure 6

**a**

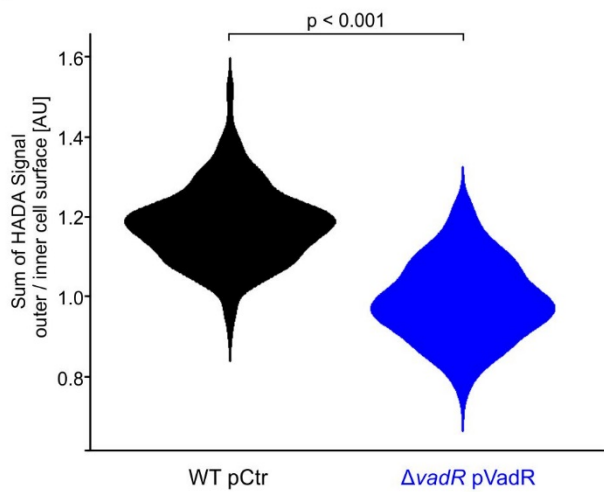

**b**

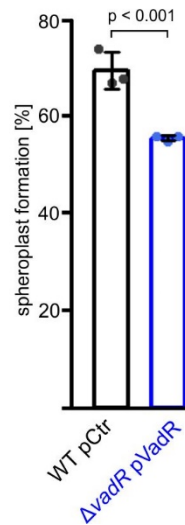

**Supplementary Figure 6: Microscopic analysis of *V. cholerae* cells using HADA labelling.** **a** *V. cholerae* wild-type pCtrl and  $\Delta vadR$  pVadR strains were grown to an  $OD_{600}$  of 0.3 and peptidoglycan was stained with HADA. The HADA-signal of nascent peptidoglycan serves for an image-based comparison of the outer versus the inner curvature of bent cells by measuring the two cell halves along the centerline separately.  $n = 231$  ( $\Delta vadR$  pVadR) and 267 (wild-type pCtrl) over three independent experiment. Statistical significance was determined using one-sided Kruskal-Wallis rank sum test. **b** Spheroplast formation of penicillin G-treated *V. cholerae* cells. *V. cholerae* wild-type pCtrl and  $\Delta vadR$  pVadR strains were grown to an  $OD_{600}$  of 0.4 and peptidoglycan was stained with HADA followed by Penicillin G ( $50 \mu\text{g mL}^{-1}$  final conc.; 15 min) treatment. Spheroplast formation of individual cells was determined using fluorescent microscopy. The population mean of spheroplast-forming cells is shown.  $n = 3$  with 100 analyzed cells per independent experiment. Statistical significance was determined using one-way ANOVA and post-hoc Holm-Sidak test. Source data underlying panels **a** and **b** are provided as a Source Data file.

### Supplementary Figure 7

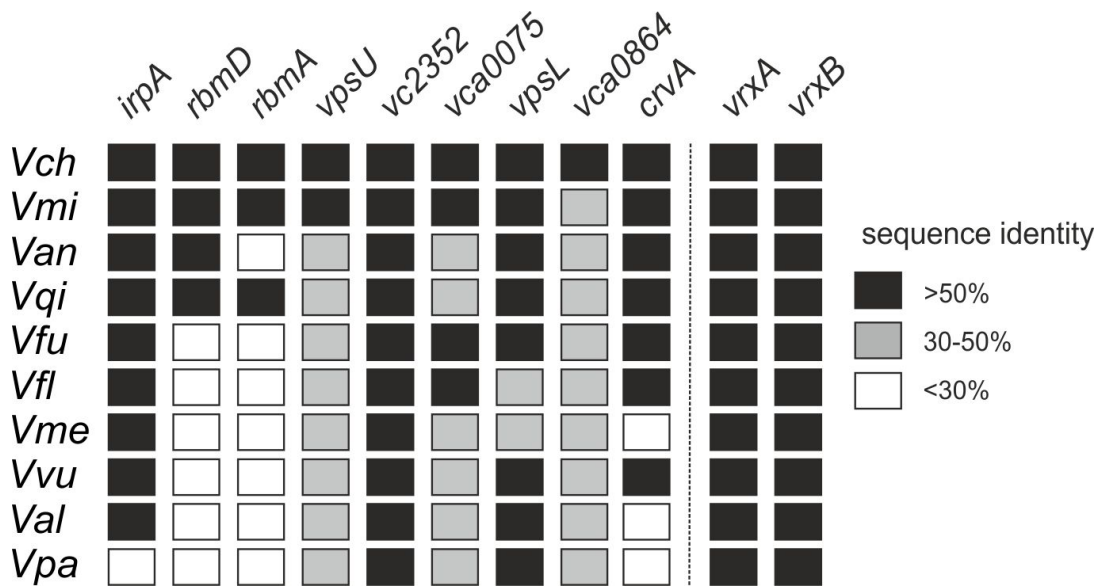

**Supplementary Figure 7: Conservation of VadR targets genes among different *Vibrio* species.** The presence of *VxrAB* and genes post-transcriptionally regulated by VadR (Fig. 3a) in other *Vibrio* species was analysed by comparing the protein sequences using KEGG<sup>2</sup>. *Vch*: *Vibrio cholerae*, *Vmi*: *Vibrio mimicus*, *Van*: *Vibrio anguillarum*, *Vqi*: *Vibrio qinghaiensis*, *Vfu*: *Vibrio furnissii*, *Vfl*: *Vibrio fluvialis*, *Vme*: *Vibrio mediterranei*, *Vvu*: *Vibrio vulnificus*, *Val*: *Vibrio alginolyticus*, *Vpa*: *Vibrio parahaemolyticus*.

## Supplementary Materials and Methods

### Plasmid construction

All plasmids and DNA oligonucleotides used in this study are listed in Supplementary Table 3 and Supplementary Table 4, respectively. If not stated otherwise, all insert fragments were amplified from genomic DNA of *V. cholerae* C6706. The backbone for the overexpression plasmids pNP-001/003-006/008-010/013 was linearized with KPO-0092/1023 using pEVS143 as a PCR template. For the amplifications of the inserted sRNAs, the following combinations of oligonucleotides were used: KPO-1003/1004 (pNP-001), KPO-1024/1025 (pNP-003), KPO-1005/1006 (pNP-004), KPO-1015/1016 (pNP-005), KPO-1021/1022 (pNP-006), KPO-1009/1010 (pNP-008), KPO-1219/1220 (pNP-009), KPO-1001/1002 (pNP-010), and KPO-1017/1018 (pNP-013). Subsequently, linearized vector and sRNA inserts were treated with XbaI restriction enzyme and fused by ligation. The construction of overexpression plasmids pLS-014-020, pRH-005, and pSG-001/002 was achieved by Gibson assembly. pEVS143 backbone was linearized using KPO-0092/1397 (pLS-014-020) or KPO-0092/1023 (pRH-005, pSG-001/002). sRNA insert sequences were amplified using KPO-5835/5836 (pLS-014), KPO-5837/5838 (pLS-015), KPO-5841/5842 (pLS-016), KPO-5843/5844 (pLS-017), KPO-5845/5846 (pLS-018), KPO-5847/5848 (pLS-019), KPO-5849/5850 (pLS-020), KPO-1226/1227 (pRH-005), KPO-1858/1859 (pSG-001), and KPO-1860/1861 (pSG-002). Further, Gibson assembly was used to generate the inducible overexpression plasmids pMD-097, pNP-019, and pNP-123-127. For these plasmids, pMD-004 served as backbone and was linearized using KPO-0196/1397 (pMD-097 and pNP-019) or KPO-0196/1488 (pNP-123-127). Amplification of insert genes were achieved with oligonucleotide combinations KPO-2554/2555 (pMD-097), KPO-1400/1401 (pNP-019), KPO-4852/4918 (pNP-123), KPO-4852/4919 (pNP-125), KPO-4852/4920 (pNP-126), and KPO-4852/4921 (pNP-127). Plasmid pNP-124 was assembled from two insert fragments, which were amplified with oligonucleotides KPO-4852/4853 and KPO-4854/4855, respectively. Plasmids pEE-007, pLS-026-028, and pMS-001-002 were generated by oligonucleotide-directed mutagenesis of pNP-005 (pEE-007) and pAE-002 (pLS-026-028, pMS-001-002), using KPO-4098/4099 (pEE-007), KPO-5981/5982 (pLS-026), KPO-5983/5984 (pLS-027), KPO-5985/5986 (pLS-028), KPO-6472/6473 (pMS-001), and KPO-6474/6475 (pMS-002). The promoter region of *vadR* was amplified using KPO-1906/1907 and KPO-4410/4411 for plasmids pAE-002 and pNP-122, respectively. To generate pAE-002, the obtained fragment and the pCMW-1C vector were digested with SphI and Sall enzymes and fused by ligation. Likewise, pNP-122 was obtained by ligation after treating insert and pBBR1-MCS5-lacZ equally with restriction enzymes SpeI and Sall. 5' UTRs and initial coding sequences for the construction of the translational reporter plasmids pNP-064/070-073, pRG-011-013 and pRH-090/092 were amplified using KPO-1720/1721 (pNP-064), KPO-

2067/2068 (pNP-070), KPO-2069/2070 (pNP-071), KPO-2071/2072 (pNP-072), KPO-2065/2066 (pNP-073), KPO-3735/3736 (pNP-113), KPO-3739/3740 (pNP-114), KPO-3737/3738 (pNP-115), KPO-2383/2384 (pRG-011), KPO-2385/2386 (pRG-012), KPO-2389/2390 (pRG-013), KPO-5534/5535 (pRH-090), and KPO-5538/5539 (pRH-092). Restriction digests of the amplified fragments and the pXG10-SF vector were conducted using NsiI and NheI enzymes. Inserts and vectors were combined by ligation. Plasmid pMH-039 was generated by Gibson assembly, using KPO-1702/1703 to linearize the pXG10-SF vector and KPO-1801/2803 to amplify the insert fragment, respectively. To build the suicide plasmid pNP-133, flanking regions of the *vadR* locus were amplified using KPO-1294/1295 and KPO-1296/1297. The two fragments were combined by overlap PCR with KPO-1298/1299. Restriction digest of the obtained insert fragment and of the pKAS32 vector using KpnI and AroI enzymes and subsequent ligation, yielded the functional plasmid. To build plasmid pRH-093, pNP-133 was linearized with KPO-5550/5551. The required insert was amplified from pNP-117 using KPO-5548/5549. Gibson assembly of both parts resulted in pRH-093. Plasmids pNP-128/132/134/135 and pRH-099 were obtained by Gibson assembly, using a pKAS32 vector, which was linearized with KPO-0267/0268. The single insert fragment of pNP-128 was amplified with KPO-5456/5457. The flanking regions of the *crvA* gene and the *vxrABCDE* operon were amplified using the two oligonucleotide combinations KPO-5450/5451, KPO-5452/5453 (pNP-134) and KPO-4621/4622, KPO-4625/4626 (pNP-135), respectively. To introduce a *crvA*-3xFLAG construct onto the chromosome of *V. cholerae*, plasmid pNP-132 was designed. The corresponding flanking regions were amplified using KPO-5442/5443 and KPO-5446/5447. Oligonucleotides KPO-5444/5445 were used to amplify the 3xFLAG epitope from template plasmid pRH-030. The *araC*-P<sub>BAD</sub> insert of pRH-099 was amplified from pMD-004 using KPO-4529/0196. Flanking regions of the *crvAB* promoter were amplified using oligos KPO-6013/6014 and KPO-6015/6016, respectively. Plasmid pNUT1403 was generated by ligating the *vadR* promoter fused to *mruby2* gene, amplified with oligo pair KDO-0626 and KDO1721, at XbaI-SphI restriction site of pNUT542 plasmid. *mRuby2* gene was used from pNUT883 and *vadR* promoter region was amplified from plasmid pAE-002. All mutations for compensatory base pair exchanges were introduced by oligonucleotide-directed mutagenesis using the oligonucleotides listed in Supplementary Table 4, and the respective parental plasmids as a template.

### **Construction of *V. cholerae* mutant strains**

All strains used in this study are listed in Supplementary Table 2. *V. cholerae* C6706 was used as the wild-type strain in this study. *V. cholerae* mutant strains were generated as described previously<sup>3</sup>. Conjugal transfer was used to introduce plasmids into *V. cholerae* from

*E. coli* S17 $\lambda$ pir donor strains. Transconjugants were selected using appropriate antibiotics, and 50 U mL<sup>-1</sup> polymyxin B was used to select against *E. coli* donor strains.

### **Transcript stability experiments**

Stability of *VadR* was determined as described previously<sup>4</sup>. Briefly, biological triplicates of *V. cholerae* wild-type (KPS-0014) and  $\Delta hfq$  (KPS-0054) strains were grown to OD<sub>600</sub> of 0.2 and transcription was terminated by addition of 250  $\mu$ g mL<sup>-1</sup> rifampicin. Transcript levels were probed and quantified using Northern blot analysis.

### **Genetic screen for transcriptional regulators of the *vadR* promoter**

A plasmid library, expressing *V. cholerae* genomic fragments<sup>5</sup>, was screened for activation of *vadR* promoter (*PvadR*) activity. To this end, *lacZ*-deficient *E. coli* BW25113 strains, harboring pNP-122, were transformed with pZach library plasmids. Transformants were selected on LB plates, containing the respective antibiotics and 20  $\mu$ g mL<sup>-1</sup> 5-Brom-4-chlor-3-indoxyl- $\beta$ -D-galactopyranosid (X-gal). 23,000 colonies (representing ~11-fold coverage) were monitored for  $\beta$ -galactosidase activity.

### **$\beta$ -galactosidase reporter assays**

*E. coli* BW25113 strains harboring the pZ genomic fragment expression plasmids and pNP-122 were grown to OD<sub>600</sub> of 1.5 in LB. Cells were resuspended in Z-buffer to yield 1.0 OD<sub>600</sub> mL<sup>-1</sup>. Cells were lysed by addition of 75  $\mu$ L chloroform and 50  $\mu$ L 0.1% SDS and vortexing. Lysates were centrifuged (16,000 x g, 5 min) and the resulting supernatant treated with *O*-Nitrophenyl- $\beta$ -D-galactopyranoside (ONPG). The reactions were stopped by addition of sodium carbonate (Na<sub>2</sub>CO<sub>3</sub>). The specific activities were obtained by measuring absorbance at OD<sub>420</sub>, OD<sub>550</sub>, and OD<sub>600</sub> using a Spark 10M plate reader (Tecan).  $\beta$ -galactosidase activity was deduced from the values by calculating Miller units.

### **Quantitative real-time PCR**

Total RNA was isolated using the SV Total RNA Isolation System (Promega), according to the manufacturer's instructions. qRT-PCR was performed using the Luna Universal One-Step RT-qPCR Kit (New England BioLabs) and the MyiQ™ Single-Color Real-Time PCR Detection System (Bio-Rad). *recA* was used as a reference gene.

### **Analysis of VxrB-HIS ChIP-seq data**

The raw data of the VxrB-HIS ChIP experiment conducted by Shin et al.<sup>1</sup> was obtained from Gene Expression Omnibus (GEO) under the accession number GSE135009. The read files were imported into CLC Genomics Workbench v11 (Qiagen) and trimmed for quality using

default parameters. Reads were mapped to the *V. cholerae* reference genome (NCBI accession numbers: NC\_002505.1 and NC\_002506.1) using the “RNA-Seq Analysis” tool with default parameters.

### **RNA *in vitro* analysis**

A DNA template carrying the T7 promoter for *in vitro* synthesis of RNA was prepared by PCR using oligonucleotides KPO-5083 and KPO-5084. 200 ng of template DNA were *in vitro* transcribed using the AmpliScribe T7-Flash transcription kit (Epicentre) following the manufacturer’s recommendations. RNA size and integrity were verified on denaturing polyacrylamide gels. For 5’ end labelling, 20 pmol of RNA were dephosphorylated using 10 units of calf alkaline phosphatase (NEB), followed by P:C:I extraction and ethanol precipitation of RNA. Dephosphorylated RNA was incubated with [<sup>32</sup>P]-γATP (20 μCi) and 1 unit of polynucleotide kinase (NEB) for 1 h at 37 °C. Unincorporated nucleotides were removed using Microspin G-50 Columns (GE Healthcare). Labelled RNA was loaded on a 6%/7 M urea gel, cut from the gel, eluted overnight at 4 °C in RNA elution buffer (0.1 M sodium acetate, 0.1% SDS, 10 mM EDTA), and recovered by P:C:I extraction.

RNA structure probing was carried out as described previously<sup>6</sup> with few modifications. In brief, for 0.4 pmol 5'-end-labelled VadR sRNA was denatured, quickly chilled on ice and supplemented with 1x structure buffer (0.01 M Tris [pH 7], 0.1 M KCl, 0.01 M MgCl<sub>2</sub>) and 1 μg yeast RNA. Samples were incubated at 37°C, and treated with RNase T1 (0.1 U; Ambion no. AM2283) for 60, 120 and 180 sec, or with lead(II) acetate (final concentration, 5 mM; Sigma no. 316512) for 15, 30 and 90 sec.

Reactions were stopped by the addition of 2 vol. stop/precipitation buffer (1 M guanidinium thiocyanate, 0.167% N-lauryl-sarcosine, 10 mM DTT, 83% 2-propanol). RNA was precipitated for 2 h at -20 °C, and collected by centrifugation (30 min, 4 °C, 13.000 rpm). Samples were dissolved in GLII loading buffer and separated on 10% polyacrylamide sequencing gels.

### **Fluorescence microscopy**

*V. cholerae* strains were cultivated in LB and stained with 50 μM HADA for 5 min at room temperature. Afterwards, the cells were pelleted, washed in 1x PBS, and fixed in 2.5% paraformaldehyde in 1x PBS. To visualize spheroplast formation HADA-stained cells were cultured in LB without any washing steps in the presence of 50 μg/ml penicillin G for 15 min, pelleted, washed in 1xPBS, and fixed in 2.5% paraformaldehyde in 1xPBS. Membrane staining was conducted by addition of 0.5 mg mL<sup>-1</sup> Nile red. Phase contrast imaging was performed on a Zeiss Axio Imager M1 microscope equipped with EC Plan Neofluar 100x/ 1.3 Oil Ph3 objective (Zeiss). For additional magnification and imaging of fluorescent dyes, a 2.5 x optovar

and appropriate filter sets were used. Image acquisition was conducted with the AxioVision software-package (Zeiss).



**Supplementary Table 1** Genes differentially regulated by *vadR* pulse expression

| ID             | Gene        | Description <sup>#</sup>                                 | Fold change <sup>*</sup> |
|----------------|-------------|----------------------------------------------------------|--------------------------|
| <i>vc0932</i>  | <i>rbmE</i> | uncharacterized protein                                  | -4.70                    |
| <i>vc0934</i>  | <i>vpsL</i> | capsular polysaccharide biosynthesis glycosyltransferase | -4.61                    |
| <i>vc0933</i>  | <i>rbmF</i> | uncharacterized protein                                  | -4.57                    |
| <i>vc0928</i>  | <i>rbmA</i> | rugosity and biofilm structure modulator A               | -3.58                    |
| <i>vc0935</i>  | <i>vpsM</i> | polysaccharide biosynthesis protein                      | -3.48                    |
| <i>vc0936</i>  | <i>vpsN</i> | polysaccharide biosynthesis/export protein               | -3.23                    |
| <i>vc0917</i>  | <i>vpsA</i> | UDP-N-acetylglucosamine 2-epimerase                      | -3.19                    |
| <i>vc0919</i>  | <i>vpsC</i> | serine O-acetyltransferase                               | -3.03                    |
| <i>vc0918</i>  | <i>vpsB</i> | UDP-N-acetyl-D-mannosaminuronic acid dehydrogenase       | -2.92                    |
| <i>vc0916</i>  | <i>vpsU</i> | tyrosine-protein phosphatase                             | -2.83                    |
| <i>vc0931</i>  | <i>rbmD</i> | hypothetical protein                                     | -2.71                    |
| <i>vca0043</i> |             | hypothetical protein                                     | -2.55                    |
| <i>vca0864</i> |             | methyl-accepting chemotaxis protein                      | -2.53                    |
| <i>vc0920</i>  | <i>vpsD</i> | polysaccharide biosynthesis protein                      | -2.47                    |
| <i>vc1888</i>  | <i>bap1</i> | extracellular matrix protein                             | -2.38                    |
| <i>vc0937</i>  | <i>vpsO</i> | polysaccharide biosynthesis transport protein            | -2.38                    |
| <i>vc1264</i>  | <i>irpA</i> | iron-regulated protein A                                 | -2.34                    |
| <i>vc0938</i>  | <i>vpsP</i> | polysaccharide biosynthesis protein                      | -2.14                    |
| <i>vc2352</i>  |             | concentrative nucleoside transporter, CNT family         | -1.97                    |
| <i>vca0075</i> |             | hypothetical protein                                     | -1.89                    |
| <i>vca1075</i> | <i>crvA</i> | hypothetical protein                                     | -1.81                    |
| <i>vc0930</i>  | <i>rbmC</i> | rugosity and biofilm structure modulator C               | -1.79                    |
| <i>vca0044</i> |             | pseudogene                                               | -1.77                    |
| <i>vca0074</i> |             | diguanylate cyclase                                      | -1.77                    |
| <i>vc0018</i>  | <i>ibpA</i> | molecular chaperone IbpA                                 | -1.76                    |
| <i>vca0129</i> | <i>rbsC</i> | ribose transport system permease protein                 | 1.81                     |
| <i>vca0128</i> | <i>rbsA</i> | ribose transport system ATP-binding protein              | 1.96                     |
| <i>vca0127</i> | <i>rbsD</i> | D-ribose pyranase                                        | 2.22                     |

<sup>#</sup>Description is based on the annotation at KEGG (<https://www.genome.jp/kegg>)

<sup>\*</sup>Fold change is based on transcriptomic analysis of pBAD-derived *vadR* expression using RNA-seq. Genes with a fold-change of at least 1.75-fold in either condition and a FDR adjusted p-value  $\leq 0.001$  were considered to be differentially expressed.

**Supplementary Table 2** Bacterial strains used in this study

| Strain                    | Relevant markers/ genotype                                                                                                                                                                                                                         | Reference/ source |
|---------------------------|----------------------------------------------------------------------------------------------------------------------------------------------------------------------------------------------------------------------------------------------------|-------------------|
| <b><i>V. cholerae</i></b> |                                                                                                                                                                                                                                                    |                   |
| KPS-0014                  | Wild-type C6706                                                                                                                                                                                                                                    | <sup>7</sup>      |
| KPS-0053                  | $\Delta hapR$ C6706                                                                                                                                                                                                                                | <sup>4</sup>      |
| KPS-0054                  | $\Delta hfq$ C6706                                                                                                                                                                                                                                 | <sup>8</sup>      |
| KPVC-10126                | $\Delta vadR$ C6706                                                                                                                                                                                                                                | This study        |
| KPVC-12430                | $\Delta vxrABCDE$ C6706                                                                                                                                                                                                                            | This study        |
| KPVC-12817                | $\Delta crvA$ C6706                                                                                                                                                                                                                                | This study        |
| KPVC-12912                | <i>crvA</i> M1* C6706                                                                                                                                                                                                                              | This study        |
| KPVC-12913                | <i>crvA::crvA-3xFLAG</i> C6706                                                                                                                                                                                                                     | This study        |
| KPVC-12914                | $\Delta vadR crvA::crvA-3xFLAG$ C6706                                                                                                                                                                                                              | This study        |
| KPVC-13214                | <i>vadR</i> M1 C6706                                                                                                                                                                                                                               | This study        |
| KPVC-13215                | <i>vadR</i> M1 <i>crvA</i> M1* C6706                                                                                                                                                                                                               | This study        |
| KPVC-13223                | <i>rbmA::rbmA-3xFLAG</i> , <i>rbmC::rbmC-3xFLAG</i> , <i>bapI::bapI-3xFLAG</i> C6706                                                                                                                                                               | This study        |
| KPVC-13384                | <i>P<sub>crvAB</sub>::araC-P<sub>BAD</sub></i> C6706                                                                                                                                                                                               | This study        |
| KPVC-13439                | $\Delta hapR \Delta rbmA$ C6706                                                                                                                                                                                                                    | This study        |
| <b><i>E. coli</i></b>     |                                                                                                                                                                                                                                                    |                   |
| BW25113                   | <i>lacI</i> <sup>+</sup> <i>rrnB</i> <sub>T14</sub> $\Delta lacZ_{WJ16}$ <i>hsdR514</i> $\Delta araBAD_{AH33}$ $\Delta rhaBAD_{LD78}$ <i>rph-1</i> $\Delta(araB-D)567$ $\Delta(rhaD-B)568$ $\Delta lacZ4787(::rrnB-3)$ <i>hsdR514</i> <i>rph-1</i> | <sup>9</sup>      |
| TOP10                     | <i>mcrA</i> $\Delta$ ( <i>mrr-hsdRMS-mcrBC</i> ) $\Phi 80lacZ\Delta M15\Delta lacX74deoRrecA1$<br><i>araD139\Delta(ara-leu)7697 galU galK rpsL endA1 nupG</i>                                                                                      | Invitrogen        |
| S17 $\lambda$ pir         | $\Delta lacU169$ ( $\Phi lacZ\Delta M15$ ), <i>recA1</i> , <i>endA1</i> , <i>hsdR17</i> , <i>thi-1</i> , <i>gyrA96</i> , <i>relA1</i> , $\lambda$ pir                                                                                              | <sup>10</sup>     |

**Supplementary Table 3** Plasmids used in this study

| Plasmid trivial name       | Plasmid stock name- | Plasmid backbone | Relevant fragment                    | Comment                                            | Origin*, marker          | Plasmid copy number per cell | Reference     |
|----------------------------|---------------------|------------------|--------------------------------------|----------------------------------------------------|--------------------------|------------------------------|---------------|
| pBBR1MCS 5-5-lacZ          |                     | pBBR1MCS         | <i>lacZ</i>                          | Promoterless plasmid for transcriptional reporters | pBBR1, Gent <sup>R</sup> | 15-40 <sup>11</sup>          | <sup>11</sup> |
| <i>PvadR-mKate2</i>        | pAE-002             | pCMW-1C          | <i>PvadR-mKate2</i>                  | <i>vadR</i> transcriptional reporter plasmid       | p15A, Cm <sup>R</sup>    | 20-30                        | This study    |
| pCMW-1C                    | pCMW-1C             | pCMW-1C          | Cm <sup>R</sup> cassette             | Promoterless plasmid for transcriptional reporters | p15A, Cm <sup>R</sup>    | 20-30                        | <sup>12</sup> |
| pCtr                       | pCMW-1K             | pCMW-1K          | Kan <sup>R</sup> cassette            | Control plasmid                                    | p15A, Kan <sup>R</sup>   | 20-30                        | <sup>13</sup> |
| pKAS32- <i>ΔrbmA</i>       | pCN-007             | pKAS32           | up-/downstream flanks of <i>rbmA</i> | suicide plasmid for <i>rbmA</i> knockout           | R6K, Amp <sup>R</sup>    | suicide plasmid              | <sup>14</sup> |
| pKAS32- <i>rbmA-3xFLAG</i> | pCN-018             | pKAS32           | 3xFLAG                               | <i>rbmA-3xFLAG</i> allelic replacement             | R6K, Amp <sup>R</sup>    | suicide plasmid              | <sup>14</sup> |
| pKAS32- <i>rbmC-3xFLAG</i> | pCN-019             | pKAS32           | 3xFLAG                               | <i>rbmC-3xFLAG</i> allelic replacement             | R6K, Amp <sup>R</sup>    | suicide plasmid              | <sup>14</sup> |
| pKAS32- <i>bapI-3xFLAG</i> | pCN-020             | pKAS32           | 3xFLAG                               | <i>bap1-3xFLAG</i> allelic replacement             | R6K, Amp <sup>R</sup>    | suicide plasmid              | <sup>15</sup> |
| pVadRΔR1                   | pEE-007             | pEVS143          | <i>vadR ΔR1</i>                      | <i>vadR ΔR1</i> expression plasmid                 | p15A, Kan <sup>R</sup>   | 20-30                        | This study    |
| pEVS143                    | pEVS143             | pEVS143          | Ptac promoter                        | Constitutive over-expression plasmid               | p15A, Kan <sup>R</sup>   | 20-30                        | <sup>4</sup>  |
| pKAS32                     | pKAS32              | pKAS32           |                                      | suicide plasmid for allelic exchange               | R6K, Amp <sup>R</sup>    | suicide plasmid              | <sup>16</sup> |
| pVcr025                    | pLS-014             | pEVS143          | <i>vcr025</i>                        | <i>vcr025</i> expression plasmid                   | p15A, Kan <sup>R</sup>   | 20-30                        | This study    |
| pVcr062                    | pLS-015             | pEVS143          | <i>vcr062</i>                        | <i>vcr062</i> expression plasmid                   | p15A, Kan <sup>R</sup>   | 20-30 <sup>#</sup>           | This study    |
| pVcr058                    | pLS-016             | pEVS143          | <i>vcr058</i>                        | <i>vcr058</i> expression plasmid                   | p15A, Kan <sup>R</sup>   | 20-30                        | This study    |
| pVcr071                    | pLS-017             | pEVS143          | <i>vcr071</i>                        | <i>vcr071</i> expression plasmid                   | p15A, Kan <sup>R</sup>   | 20-30                        | This study    |
| pVcr067                    | pLS-018             | pEVS143          | <i>vcr067</i>                        | <i>vcr067</i> expression plasmid                   | p15A, Kan <sup>R</sup>   | 20-30                        | This study    |
| pVcr094                    | pLS-019             | pEVS143          | <i>vcr094</i>                        | <i>vcr094</i> expression plasmid                   | p15A, Kan <sup>R</sup>   | 20-30                        | This study    |
| pVcr099                    | pLS-020             | pEVS143          | <i>vcr099</i>                        | <i>vcr099</i> expression plasmid                   | p15A, Kan <sup>R</sup>   | 20-30                        | This study    |
| pΔ <i>site1-mKate2</i>     | pLS-026             | pCMW-1C          | <i>PvadRΔsite1-mKate2</i>            | <i>vadR</i> transcriptional reporter plasmid       | p15A, Cm <sup>R</sup>    | 20-30                        | This study    |

|                                |         |          |                                                 |                                                 |                             |       |               |
|--------------------------------|---------|----------|-------------------------------------------------|-------------------------------------------------|-----------------------------|-------|---------------|
| pΔsite2-<br><i>mKate2</i>      | pLS-027 | pCMW-1C  | <i>PvadRΔsit</i><br><i>e2-</i><br><i>mKate2</i> | <i>vadR</i> transcriptional<br>reporter plasmid | p15A,<br>Cm <sup>R</sup>    | 20-30 | This study    |
| pΔsite3-<br><i>mKate2</i>      | pLS-028 | pCMW-1C  | <i>PvadRΔsit</i><br><i>e3-</i><br><i>mKate2</i> | <i>vadR</i> transcriptional<br>reporter plasmid | p15A,<br>Cm <sup>R</sup>    | 20-30 | This study    |
| pΔspacer1/<br><i>2-mKate2</i>  | pMS-001 | pCMW-1C  | <i>PvadRΔsit</i><br><i>e2-</i><br><i>mKate2</i> | <i>vadR</i> transcriptional<br>reporter plasmid | p15A,<br>Cm <sup>R</sup>    | 20-30 | This study    |
| pΔspacer2/<br><i>3-mKate2</i>  | pMS-002 | pCMW-1C  | <i>PvadRΔsit</i><br><i>e2-</i><br><i>mKate2</i> | <i>vadR</i> transcriptional<br>reporter plasmid | p15A,<br>Cm <sup>R</sup>    | 20-30 | This study    |
| pBAD                           | pMD-004 | pBAD-1K  |                                                 | Control plasmid                                 | p15A,<br>Kan <sup>R</sup>   | 20-30 | <sup>12</sup> |
| pVcr084                        | pMD-097 | pEVS143  | <i>vcr084</i>                                   | <i>vcr084</i> expression<br>plasmid             | p15A,<br>Kan <sup>R</sup>   | 20-30 | This study    |
| <i>pvca0864-</i><br><i>gfp</i> | pMH-039 | pXG10-1C | <i>vca0864-</i><br><i>gfp</i>                   | Translational reporter<br><i>vca0864-gfp</i>    | pSC101*,<br>Cm <sup>R</sup> | 3-4   | This study    |
| pVcr002                        | pNP-001 | pEVS143  | <i>vcr002</i>                                   | <i>vcr002</i> expression<br>plasmid             | p15A,<br>Kan <sup>R</sup>   | 20-30 | This study    |
| pVcr036                        | pNP-003 | pEVS143  | <i>vcr036</i>                                   | <i>vcr036</i> expression<br>plasmid             | p15A,<br>Kan <sup>R</sup>   | 20-30 | This study    |
| pVcr043                        | pNP-004 | pEVS143  | <i>vcr043</i>                                   | <i>vcr043</i> expression<br>plasmid             | p15A,<br>Kan <sup>R</sup>   | 20-30 | This study    |
| pVadR                          | pNP-005 | pEVS143  | <i>vadR</i>                                     | <i>vadR</i> expression<br>plasmid               | p15A,<br>Kan <sup>R</sup>   | 20-30 | This study    |
| pVcr079                        | pNP-006 | pEVS143  | <i>vcr079</i>                                   | <i>vcr079</i> expression<br>plasmid             | p15A,<br>Kan <sup>R</sup>   | 20-30 | This study    |
| pVcr034                        | pNP-008 | pEVS143  | <i>vcr034</i>                                   | <i>vcr034</i> expression<br>plasmid             | p15A,<br>Kan <sup>R</sup>   | 20-30 | This study    |
| pVcr082                        | pNP-009 | pEVS143  | <i>vcr082</i>                                   | <i>vcr082</i> expression<br>plasmid             | p15A,<br>Kan <sup>R</sup>   | 20-30 | This study    |
| pVcr092                        | pNP-010 | pEVS143  | <i>vcr092</i>                                   | <i>vcr092</i> expression<br>plasmid             | p15A,<br>Kan <sup>R</sup>   | 20-30 | This study    |
| pVcr045                        | pNP-013 | pEVS143  | <i>vcr045</i>                                   | <i>vcr045</i> expression<br>plasmid             | p15A,<br>Kan <sup>R</sup>   | 20-30 | This study    |
| pBAD- <i>vadR</i>              | pNP-019 | pBAD-1K  | <i>P<sub>BAD</sub>-vadR</i>                     | Inducible <i>vadR</i><br>expression plasmid     | p15A,<br>Kan <sup>R</sup>   | 20-30 | This study    |
| <i>prbmC-gfp</i>               | pNP-064 | pXG10-1C | <i>rbmC-gfp</i>                                 | Translational reporter<br><i>rbmC-gfp</i>       | pSC101*,<br>Cm <sup>R</sup> | 3-4   | This study    |
| <i>pvpsU-gfp</i>               | pNP-070 | pXG10-1C | <i>vpsU-gfp</i>                                 | Translational reporter<br><i>vpsQ-gfp</i>       | pSC101*,<br>Cm <sup>R</sup> | 3-4   | This study    |
| <i>prbmA-gfp</i>               | pNP-071 | pXG10-1C | <i>rbmA-gfp</i>                                 | Translational reporter<br><i>rbmA-gfp</i>       | pSC101*,<br>Cm <sup>R</sup> | 3-4   | This study    |
| <i>prbmD-gfp</i>               | pNP-072 | pXG10-1C | <i>rbmD-gfp</i>                                 | Translational reporter<br><i>rbmD-gfp</i>       | pSC101*,<br>Cm <sup>R</sup> | 3-4   | This study    |
| <i>pvpsL-gfp</i>               | pNP-073 | pXG10-1C | <i>vpsL-gfp</i>                                 | Translational reporter<br><i>vpsL-gfp</i>       | pSC101*,<br>Cm <sup>R</sup> | 3-4   | This study    |
| <i>pirpA-gfp</i>               | pNP-113 | pXG10-1C | <i>irpA-gfp</i>                                 | Translational reporter<br><i>irpA-gfp</i>       | pSC101*,<br>Cm <sup>R</sup> | 3-4   | This study    |

|                                          |         |              |                                                  |                                                      |                              |                     |               |
|------------------------------------------|---------|--------------|--------------------------------------------------|------------------------------------------------------|------------------------------|---------------------|---------------|
| pvc2352- <i>gfp</i>                      | pNP-114 | pXG10-1C     | vc2352- <i>gfp</i>                               | Translational reporter<br><i>vc2352-gfp</i>          | pSC101*,<br>Cm <sup>R</sup>  | 3-4                 | This study    |
| pvc0043- <i>gfp</i>                      | pNP-115 | pXG10-1C     | vca0043- <i>gfp</i>                              | Translational reporter<br><i>vca0043-gfp</i>         | pSC101*,<br>Cm <sup>R</sup>  | 3-4                 | This study    |
| p <i>crvA</i> M1*- <i>gfp</i>            | pNP-116 | pXG10-1C     | <i>crvA</i> M1*- <i>gfp</i>                      | Translational reporter<br><i>crvA</i> M1- <i>gfp</i> | pSC101*,<br>Cm <sup>R</sup>  | 3-4                 | This study    |
| pVadR M1                                 | pNP-117 | pEVS143      | <i>vadR</i> M1                                   | <i>vadR</i> M1 expression<br>plasmid                 | p15A,<br>Kan <sup>R</sup>    | 20-30               | This study    |
| pVadR M3                                 | pNP-118 | pEVS143      | <i>vadR</i> M3                                   | <i>vadR</i> M3 expression<br>plasmid                 | p15A,<br>Kan <sup>R</sup>    | 20-30               | This study    |
| p <i>vpsU</i> M2*- <i>gfp</i>            | pNP-119 | pXG10-1C     | <i>vpsU</i> M2*- <i>gfp</i>                      | Translational reporter<br><i>vpsU</i> M2- <i>gfp</i> | pSC101*,<br>Cm <sup>R</sup>  | 3-4                 | This study    |
| p <i>rbmA</i> M1*- <i>gfp</i>            | pNP-120 | pXG10-1C     | <i>rbmA</i> M1*- <i>gfp</i>                      | Translational reporter<br><i>rbmA</i> M1- <i>gfp</i> | pSC101*,<br>Cm <sup>R</sup>  | 3-4                 | This study    |
| p <i>vpsL</i> M3*- <i>gfp</i>            | pNP-121 | pXG10-1C     | <i>vpsL</i> M3*- <i>gfp</i>                      | Translational reporter<br><i>vpsL</i> M3- <i>gfp</i> | pSC101*,<br>Cm <sup>R</sup>  | 3-4                 | This study    |
| P <i>vadR-lacZ</i>                       | pNP-122 | pBBR1MC<br>S | P <i>vadR-lacZ</i>                               | <i>vadR</i> transcriptional<br>reporter plasmid      | pBBR1,<br>Gent <sup>R</sup>  | 15-40 <sup>11</sup> | This study    |
| pBAD- <i>vxrA</i>                        | pNP-123 | pBAD-1K      | <i>vxrA</i>                                      | Inducible <i>vxrA</i><br>expression plasmid          | p15A,<br>Kan <sup>R</sup>    | 20-30               | This study    |
| pBAD- <i>vxrAB</i>                       | pNP-124 | pBAD-1K      | <i>vxrAB</i>                                     | Inducible <i>vxrAB</i><br>expression plasmid         | p15A,<br>Kan <sup>R</sup>    | 20-30               | This study    |
| pBAD- <i>vxrABC</i>                      | pNP-125 | pBAD-1K      | <i>vxrABC</i>                                    | Inducible <i>vxrABC</i><br>expression plasmid        | p15A,<br>Kan <sup>R</sup>    | 20-30               | This study    |
| pBAD- <i>vxrABCD</i>                     | pNP-126 | pBAD-1K      | <i>vxrABCD</i>                                   | Inducible <i>vxrABCD</i><br>expression plasmid       | p15A,<br>Kan <sup>R</sup>    | 20-30               | This study    |
| pBAD- <i>vxrABCDE</i>                    | pNP-127 | pBAD-1K      | <i>vxrABCDE</i>                                  | Inducible <i>vxrABCDE</i><br>expression plasmid      | p15A,<br>Kan <sup>R</sup>    | 20-30               | This study    |
| pKAS32-<br>$\Delta$ <i>crvA</i>          | pNP-128 | pKAS32       | <i>crvA</i><br>region                            | <i>crvA</i> region                                   | R6K,<br>Amp <sup>R</sup>     | suicide<br>plasmid  | This study    |
| pKAS32-<br><i>crvA</i> M1*               | pNP-129 | pKAS32       | <i>crvA</i> M1*                                  | <i>crvA</i> M1* allelic<br>replacement               | R6K,<br>Amp <sup>R</sup>     | suicide<br>plasmid  | This study    |
| pKAS32-<br><i>crvA</i> -<br>3xFLAG       | pNP-132 | pKAS32       | <i>crvA</i> -<br>3xFLAG                          | <i>crvA</i> -3xFLAG allelic<br>replacement           | R6K,<br>Amp <sup>R</sup>     | suicide<br>plasmid  | This study    |
| pKAS32-<br>$\Delta$ <i>vadR</i>          | pNP-133 | pKAS32       | up-<br>/downstre<br>am flanks<br><i>vadR</i>     | suicide plasmid for<br><i>vadR</i> knockout          | R6K,<br>Amp <sup>R</sup>     | suicide<br>plasmid  | This study    |
| pKAS32-<br>$\Delta$ <i>crvA</i>          | pNP-134 | pKAS32       | up-<br>/downstre<br>am flanks<br><i>crvA</i>     | suicide plasmid for<br><i>crvA</i> knockout          | R6K,<br>Amp <sup>R</sup>     | suicide<br>plasmid  | This study    |
| pKAS32-<br>$\Delta$ <i>vxrABCDE</i><br>E | pNP-135 | pKAS32       | up-<br>/downstre<br>am flanks<br><i>vxrABCDE</i> | suicide plasmid for<br><i>vxrABCDE</i> knockout      | R6K,<br>Amp <sup>R</sup>     | suicide<br>plasmid  | This study    |
| pVadR M2                                 | pNP-168 | pEVS143      | <i>vadR</i> M2                                   | <i>vadR</i> M2 expression<br>plasmid                 | p15A,<br>Kan <sup>R</sup>    | 20-30               | This study    |
| pNUT542                                  | pNUT542 | pEVS143      | Ptac-<br><i>sfGFP</i>                            | <i>sfGFP</i> expression<br>plasmid                   | pSC101,<br>Gent <sup>R</sup> | 3-4                 | <sup>17</sup> |

|                                     |          |          |                                                                            |                                                    |                           |                 |               |
|-------------------------------------|----------|----------|----------------------------------------------------------------------------|----------------------------------------------------|---------------------------|-----------------|---------------|
| pNUT883                             | pNUT883  | pEVS143  | <i>mRuby2</i>                                                              | Promoterless plasmid for transcriptional reporters | p15A, Gent <sup>R</sup>   | 20-30           | <sup>17</sup> |
| pNUT1403                            | pNUT1403 | pEVS143  | <i>PvadR-mRuby2</i>                                                        | <i>vadR</i> transcriptional reporter plasmid       | pSC101, Gent <sup>R</sup> | 3-4             | This study    |
| <i>pbap1-gfp</i>                    | pRG-011  | pXG10-1C | <i>bap1-gfp</i>                                                            | Translational reporter <i>bap1-gfp</i>             | pSC101*, Cm <sup>R</sup>  | 3-4             | This study    |
| <i>pcrvA-gfp</i>                    | pRG-012  | pXG10-1C | <i>crvA-gfp</i>                                                            | Translational reporter <i>crvA-gfp</i>             | pSC101*, Cm <sup>R</sup>  | 3-4             | This study    |
| <i>prbmF-gfp</i>                    | pRG-013  | pXG10-1C | <i>rbmF-gfp</i>                                                            | Translational reporter <i>rbmEF-gfp</i>            | pSC101*, Cm <sup>R</sup>  | 3-4             | This study    |
| pVcr098                             | pRH-005  | pEVS143  | <i>vcr098</i>                                                              | <i>vcr098</i> expression plasmid                   | p15A, Kan <sup>R</sup>    | 20-30           | This study    |
| pKAS32- <i>aphA-3xFLAG</i>          | pRH-030  | pKAS32   | 3xFLAG                                                                     | <i>aphA-3xFLAG</i> allelic replacement             | R6K, Amp <sup>R</sup>     | suicide plasmid | <sup>16</sup> |
| <i>pvca0075-gfp</i>                 | pRH-090  | pXG10-1C | <i>vca0075-gfp</i>                                                         | Translational reporter <i>vca0075-gfp</i>          | pSC101*, Cm <sup>R</sup>  | 3-4             | This study    |
| <i>prbsD-gfp</i>                    | pRH-092  | pXG10-1C | <i>rbsD-gfp</i>                                                            | Translational reporter <i>rbsD-gfp</i>             | pSC101*, Cm <sup>R</sup>  | 3-4             | This study    |
| pKAS32- <i>vadR</i> M1              | pRH-093  | pKAS32   | <i>vadR</i> M1                                                             | <i>vadR</i> M1 allelic replacement                 | R6K, Amp <sup>R</sup>     | suicide plasmid | This study    |
| pKAS32- <i>araC-P<sub>BAD</sub></i> | pRH-099  | pKAS32   | <i>araC-P<sub>BAD</sub></i> , flanking regions of <i>P<sub>crvAB</sub></i> | <i>araC-P<sub>BAD</sub></i> allelic replacement    | R6K, Amp <sup>R</sup>     | suicide plasmid | This study    |
| pVcr017                             | pSG-001  | pEVS143  | <i>vcr017</i>                                                              | <i>vcr017</i> expression plasmid                   | p15A, Kan <sup>R</sup>    | 20-30           | This study    |
| pVcr080                             | pSG-002  | pEVS143  | <i>vcr080</i>                                                              | <i>vcr080</i> expression plasmid                   | p15A, Kan <sup>R</sup>    | 20-30           | This study    |
| pXG10-SF                            | pXG10SF  | pXG10-1C | <i>'lacZ::gfp</i>                                                          | template plasmid for translational reporters       | pSC101*, Cm <sup>R</sup>  | 3-4             | <sup>18</sup> |
| pCMW-1C- <i>mKate2</i>              | pYH-010  | pCMW-1C  | <i>mKate2</i>                                                              | Promoterless plasmid for transcriptional reporters | P15A, Cm <sup>R</sup>     | 20-30           | <sup>9</sup>  |
| pZ1                                 | pZ1      |          | <i>vxrAB</i> fragment 1                                                    | <i>vxrAB</i> fragment 1 expression plasmid         | p15A, Cm <sup>R</sup>     | 20-30           | This study    |
| pZ2                                 | pZ2      |          | <i>vxrAB</i> fragment 2                                                    | <i>vxrAB</i> fragment 2 expression plasmid         | p15A, Cm <sup>R</sup>     | 20-30           | This study    |
| pZach                               | pZND132  |          | <i>V.ch.</i> genomic fragments                                             | Genomic fragment expression plasmid                | p15A, Cm <sup>R</sup>     | 20-30           | <sup>5</sup>  |

\* Plasmids with the origins of replication p15a and pBBR1 were combined in Supplementary Figure 1e. For Figs. 3a, f-i and Supplementary Figure 3a plasmids with the origins of replication p15A / pSC101\* were combined. These combinations of origins of replication are compatible (<https://blog.addgene.org/plasmid-101-origin-of-replication>). Plasmid copy numbers were obtained from <sup>19</sup>.

## Supplementary Table 4 DNA oligonucleotides used in this study

Sequences are given in 5' → 3' direction; 5' P denotes a 5' monophosphate

| ID       | Sequence                                        | Description                                                     |
|----------|-------------------------------------------------|-----------------------------------------------------------------|
| KDO-0626 | TAGCTCCTGAATTCCTAGGCCTG                         | pNUT1403                                                        |
| KDO-1721 | GGGTCTAGAGCGGAGTGACTATAAAAAGGCGC                | pNUT1403                                                        |
| KPO-0092 | CCACACATTATACGAGCCGA                            | pNP-001/003-006/008-010/013,<br>pSG001/002, pLS014-020, pRH-005 |
| KPO-0196 | GGAGAAACAGTAGAGAGTTGCCG                         | pNP-019/123-127, pMD-097,<br>pRH-099                            |
| KPO-0243 | TTCGTTTCACCTCTGAGTTCCGG                         | 5S-rRNA probe                                                   |
| KPO-0267 | TAATAGGCCTAGGATGCATATG                          | pNP-128/132/133/134/135, pRH-099                                |
| KPO-0268 | CGTTAAACAACCGGTACCTCTA                          | pNP-128/132/133/134/135, pRH-099                                |
| KPO-0331 | GAGCCAATCTACAATTCATCAGA                         | VadR probe                                                      |
| KPO-1001 | P-TCACAGAACCGCTGTGACCA                          | pNP-010                                                         |
| KPO-1002 | GTTTTTCTAGATTGACTACTTCATTCCGCAC                 | pNP-010                                                         |
| KPO-1003 | P-GCAAACACATTGGTAAGATATTAG                      | pNP-001                                                         |
| KPO-1004 | GTTTTTCTAGATATAACCTGTTCCAGAATGTGCT              | pNP-001                                                         |
| KPO-1005 | P-GTCATCTCGTTAGTCATTACGA                        | pNP-004                                                         |
| KPO-1006 | GTTTTTCTAGACACTGACAAACCGGTGTTGG                 | pNP-004                                                         |
| KPO-1009 | P-ACTTACTTGGATAAATATGCATTG                      | pNP-008                                                         |
| KPO-1010 | GTTTTTCTAGAGTATTGTTGTCTGTGCATAAAGTT             | pNP-008                                                         |
| KPO-1015 | P-AATAGACAACCTTTTGTCCCTATC                      | pNP-005                                                         |
| KPO-1016 | GTTTTTCTAGAATAGAAAGCACTGAGTCAGGA                | pNP-005                                                         |
| KPO-1017 | P-TTGCCCGCAAGCCACGGC                            | pNP-013                                                         |
| KPO-1018 | GTTTTTCTAGAAGGCGATTGGTCGTGTTGTT                 | pNP-013                                                         |
| KPO-1021 | P-GTTTGAACCCCGGCGGCT                            | pNP-006                                                         |
| KPO-1022 | GTTTTTCTAGAAAACCGACTCCTTGCAAGAA                 | pNP-006                                                         |
| KPO-1023 | GTTTTTCTAGAGGATCCGGTGATTGATTGAG                 | pNP-001/003-006/008-010/013,<br>pSG001/002, pRH-005             |
| KPO-1024 | P-ACCCAAAGGGTAGAGCAAAC                          | pNP-003                                                         |
| KPO-1025 | GTTTTTCTAGAGAAAACGAAGTAATCTTCACCTT              | pNP-003                                                         |
| KPO-1219 | P-AGCTTCGCTAGCGAAGAG                            | pNP-009                                                         |
| KPO-1220 | GTTTTTCTAGAGAATGTTGCGATCAAGTTCCG                | pNP-009                                                         |
| KPO-1226 | TCGTATAATGTGTGGGTAAGGTTAGTGAGAACATTTCT          | pRH-005                                                         |
| KPO-1227 | ACCGGATCCTCTAGAAGTTTCAAATTCGTGGACAGC            | pRH-005                                                         |
| KPO-1294 | GTACATTTTGGTGTGGGAGC                            | pNP-133                                                         |
| KPO-1295 | GCACTGAGTCAGGATTTTGCATCGGCGTTATTCGGTTC          | pNP-133                                                         |
| KPO-1296 | GCAAAATCCTGACTCAGTGC                            | pNP-133                                                         |
| KPO-1297 | CAAACCCAGCTCTTTAGCTTC                           | pNP-133                                                         |
| KPO-1298 | GTTTTTGGTACCGACGCGAGATTATTTCTTCC                | pNP-133                                                         |
| KPO-1299 | GTTTTTCTAGGGATAGTCAGGCCGCTTTCCG                 | pNP-133                                                         |
| KPO-1397 | GATCCGGTGATTGATTGAGC                            | pNP-019, pMD-097, pLS014-020                                    |
| KPO-1400 | CGCAACTCTCTACTGTTTCTCCGAATAGACAACCTTTTGTCCCTATC | pNP-019                                                         |
| KPO-1401 | GCTCAATCAATCACCGGATCATAGAAAGCACTGAGTCAGGA       | pNP-019                                                         |
| KPO-1488 | TTTTTCTAGATTAATCAGAACGCAG                       | pNP-123-127                                                     |

|          |                                               |                           |
|----------|-----------------------------------------------|---------------------------|
| KPO-1702 | ATGCATGTGCTCAGTATCTCTATC                      | pMH-039                   |
| KPO-1703 | GCTAGCGGATCCGCTGG                             | pMH-039                   |
| KPO-1720 | GAGATACTGAGCACATGCATAGTTGTTATTAGCAATCCGCGATAC | pNP-064                   |
| KPO-1721 | GAGCCAGCGGATCCGCTAGCCAACGACAAAAGACCGACAGCAAG  | pNP-064                   |
| KPO-1801 | CTGTCAACCAATTACGCTGGTTTTTCTTTTTATTAAC         | pMH-039                   |
| KPO-1858 | TCGGCTCGTATAATGTGTGGGCTAGCGAAAACATAATCATAAAC  | pSG-001                   |
| KPO-1859 | CTCAATCAATCACCGGATCCGCTTTGATTGAGCAGACGTTG     | pSG-001                   |
| KPO-1860 | TCGGCTCGTATAATGTGTGGCAAGTCAGTGGTGTGG          | pSG-002                   |
| KPO-1861 | CTCAATCAATCACCGGATCCGCTACTGTCAATATCGACCAC     | pSG-002                   |
| KPO-1906 | GTTTTTGCATGCGCTGCGTGTGAAAACGATG               | pAE-002                   |
| KPO-1907 | GTTTTTGTGACCTATTTCGTGAAGCAGTGTATC             | pAE-002                   |
| KPO-2065 | GTTTTTATGCATAGATATTTCTATTGATAAAGATGTAGTCTT    | pNP-073                   |
| KPO-2066 | GTTTTTGCTAGCGCTATCAATTAATCGGTAGAAAAATTTAC     | pNP-073                   |
| KPO-2067 | GTTTTTATGCATACTCTGATAATGAGTAGATTGCG           | pNP-070                   |
| KPO-2068 | GTTTTTGCTAGCCTCTGCCATTGGCGAACGA               | pNP-070                   |
| KPO-2069 | GTTTTTATGCATTTAGCCAATGCAATTGTCTTAGATTTG       | pNP-071                   |
| KPO-2070 | GTTTTTGCTAGCATAAGAAGCCGTTGAAAATAACAATGC       | pNP-071                   |
| KPO-2071 | GTTTTTATGCATATGGCATGGCGGAGCAAGTTG             | pNP-072                   |
| KPO-2072 | GTTTTTGCTAGCACTGCCAAGAGGGATTGGTAAC            | pNP-072                   |
| KPO-2378 | GGTAACCCAGAAACTACCACTG                        | <i>recA</i> qRT-PCR       |
| KPO-2379 | CACCACTTCTTCGCCTTCTT                          | <i>recA</i> qRT-PCR       |
| KPO-2383 | GTTTTTATGCATGCTCTCAGCATATCGTTATTG             | pRG-011                   |
| KPO-2384 | GTTTTTGCTAGCGAATGCGGTGCTTTGAGTC               | pRG-011                   |
| KPO-2385 | GTTTTTATGCATGCTTAGATCTAAAGTTCAAAAAATCAG       | pRG-012                   |
| KPO-2386 | GTTTTTGCTAGCCGATGCAGATACCATAAAGG              | pRG-012                   |
| KPO-2389 | GTTTTTATGCATAAAGAAATAATATGTATCGTTTATCG        | pRG-013                   |
| KPO-2390 | GTTTTTGCTAGCATTTCATGCTAGGAAAAAATGCAATC        | pRG-013                   |
| KPO-2554 | CGCAACTCTCTACTGTTTCTCTATTACAACAAGAGAGGCTC     | pMD-097                   |
| KPO-2555 | GCTCAATCAATCACCGGATCCAGACGCTACATCAAACCTG      | pMD-097                   |
| KPO-2803 | GAGCCAGCGGATCCGCTAGCGACCACCCAACGCAGCAATC      | pMH-039                   |
| KPO-3613 | CTTGATTGGTTGGCGTGTATTG                        | <i>vpsL-O</i> qRT-PCR     |
| KPO-3614 | CTTGCCCTTGAGTAGTCATACC                        | <i>vpsL-O</i> qRT-PCR     |
| KPO3615  | CTTGTGGCGCACTTTCAATC                          | <i>rbmEF</i> qRT-PCR      |
| KPO3616  | GTGGATGACCAACGAGTACAA                         | <i>rbmEF</i> qRT-PCR      |
| KPO-3617 | GCTCTTACTGATGGTCGTATGT                        | <i>rbmA</i> qRT-PCR       |
| KPO-3618 | CTGCAACGACTTGAAGAGAAAC                        | <i>rbmA</i> qRT-PCR       |
| KPO-3621 | TAGTGCTGGCACGCTAAAG                           | <i>vpsQA-K</i> qRT-PCR    |
| KPO-3622 | TTGAGTCACTTGCTGGACTG                          | <i>vpsQA-K</i> qRT-PCR    |
| KPO-3623 | CTTGGTTGCCGCTTATTG                            | <i>rbmD</i> qRT-PCR       |
| KPO-3624 | GCATAGAAGGCCTGACAGATAC                        | <i>rbmD</i> qRT-PCR       |
| KPO-3625 | GAGCTGCAAGGTAAGGGATAC                         | <i>vca0043-44</i> qRT-PCR |
| KPO-3626 | AACTACAGACGGGCACAATC                          | <i>vca0043-44</i> qRT-PCR |
| KPO-3627 | CAGTCCCTATCCGAGCATATTG                        | <i>vca0864</i> qRT-PCR    |
| KPO-3628 | GGTAAGCTCCTCTAACCGATAAC                       | <i>vca0864</i> qRT-PCR    |
| KPO-3629 | CCGTCTTACTGGTTCTTTGG                          | <i>bapI</i> qRT-PCR       |
| KPO-3630 | GTGTCACAGGAACGGCATAA                          | <i>bapI</i> qRT-PCR       |
| KPO-3631 | CGATCTTGAGTGGATGGAGAAG                        | <i>irpA</i> qRT-PCR       |
| KPO-3632 | ATAGCGAGCCCATACCAAAC                          | <i>irpA</i> qRT-PCR       |
| KPO-3633 | GCGTGAAAGTAGCGTGTAGA                          | <i>crvA</i> qRT-PCR       |



|          |                                                 |                           |
|----------|-------------------------------------------------|---------------------------|
| KPO-3634 | TTCTGCTTCGTCAGGTATTGG                           | <i>crvA</i> qRT-PCR       |
| KPO-3635 | CTGAGCTGTTTGCGGTAATG                            | <i>vc2352</i> qRT-PCR     |
| KPO-3636 | CCGCTACCAAGTATTCGATCT                           | <i>vc2352</i> qRT-PCR     |
| KPO-3637 | GGCATCGAACATCACGATACA                           | <i>vca0074-75</i> qRT-PCR |
| KPO-3638 | CCATGGCAGTTCAGTGGTAAA                           | <i>vca0074-75</i> qRT-PCR |
| KPO-3641 | TCGGCCATACCGATGAAATC                            | <i>rbsDACB</i> qRT-PCR    |
| KPO-3642 | AGTCAGCGCGAGATCAATAC                            | <i>rbsDACB</i> qRT-PCR    |
| KPO-3643 | GGTTCTGAGCTATGGAGCTATG                          | <i>rbmC</i> qRT-PCR       |
| KPO-3644 | ATCTCAACGATTCCGTCACC                            | <i>rbmC</i> qRT-PCR       |
| KPO-3735 | GTTTTTATGCATGAAATAACAAATGATAATAATTTGCAATTC      | pNP-113                   |
| KPO-3736 | GTTTTTGCTAGCCGCTGATGTAGTGAGCGTC                 | pNP-113                   |
| KPO-3737 | GTTTTTATGCATAGCGAGTCACCAACTAATTTG               | pNP-115                   |
| KPO-3738 | GTTTTTGCTAGCTTCCAAAGCCACGCGATAAC                | pNP-115                   |
| KPO-3739 | GTTTTTATGCATGCTTAATCGCTCCATTTTGTAAC             | pNP-114                   |
| KPO-3740 | GTTTTTGCTAGCCAGTAGAACTGCGATTCCTAG               | pNP-114                   |
| KPO-4098 | TCGGCTCGTATAATGTGTGGATCTGATGAATTGTAGATTGGCT     | pEE-007                   |
| KPO-4099 | AATAGACAACCTTTTGTCCATCTGATGAATTGATGTTTTAAGC     | pEE-007                   |
| KPO-4250 | GAATACTGAACCTTTTGTCCATCTG                       | pNP-117                   |
| KPO-4251 | GTTTCAGTATTCCCACACATTATACG                      | pNP-117                   |
| KPO-4252 | GTTTCAGTTTCCACTTTATGTGG                         | pNP-116                   |
| KPO-4253 | GGAAACTGAACTTTTGACAGCTTTG                       | pNP-116                   |
| KPO-4410 | GTTTTTTACTAGTGCTGCGTGTTGAAAACGATG               | pNP-122                   |
| KPO-4411 | GTTTTTTGTCGACCTATTCGTGAAGCAGTGATC               | pNP-122                   |
| KPO-4529 | TATAAGATCATAAAAAGACCCTTCATTTATG                 | pRH-099                   |
| KPO-4621 | AGAGGTACCGGTTGTTAACGCATCATCAAGTCCACACCACT       | pNP-135                   |
| KPO-4622 | TATCCGGTAAAGAGATATTCCGAG                        | pNP-135                   |
| KPO-4625 | GAATATCTCTTTACCGGATACACCAAACCTGCTAAAAACACG      | pNP-135                   |
| KPO-4626 | TATGCATCCTAGGCCTATTACGATACCGGTGAAGCTAATGA       | pNP-135                   |
| KPO-4846 | GATTGGCTTTGACCGTCTACT                           | <i>ibpA</i> qRT-PCR       |
| KPO-4847 | GCTCGATATTGTATGGAGGGTATC                        | <i>iboA</i> qRT-PCR       |
| KPO-4852 | CAACTCTCTACTGTTTCTCCGGATAATGCGTTATAGTTTTTGC     | pNP-123-127               |
| KPO-4853 | TCAACGAGAAGCAGTGTCTG                            | pNP-124                   |
| KPO-4854 | CAGACACTGCTTCTCGTTGAAGATGATAAAAACCTCGCTGAC      | pNP-124                   |
| KPO-4855 | CTGATTTAATCTAGAAAAAATGATCAGCTTTTCATTTTGTAAC     | pNP-124                   |
| KPO-4918 | CTGATTTAATCTAGAAAAAATCAACGAGAAGCAGTGTCTG        | pNP-123                   |
| KPO-4919 | CTGATTTAATCTAGAAAAAACTATAGCGGCATATTGTCCAA       | pNP-125                   |
| KPO-4920 | CTGATTTAATCTAGAAAAAAGAGCCACACTATAAAGAGATG       | pNP-126                   |
| KPO-4921 | CTGATTTAATCTAGAAAAAAGAAAAATTGGCTACGATTATTACC    | pNP-127                   |
| KPO-5083 | GTTTTTTTAATACGACTCACTATAGGAATAGACAACCTTTTGTCCCT | In-vitro VadR             |
| KPO-5084 | AAAAAAGAGCGAGCTATTTAAAC                         | In-vitro VadR             |
| KPO-5442 | AGAGGTACCGGTTGTTAACGGCTTAGATCTAAAGTTCAAAAAATCAG | pNP-132                   |
| KPO-5443 | GCTGTCTTTGTTGGTCTGAG                            | pNP-132                   |
| KPO-5444 | TCAGACCAAACAAAGACAGCGACTACAAAGACCATGACGGTG      | pNP-132                   |
| KPO-5445 | ATCGTTGGATTTTTGTGCGGTTACTATTTATCGTCATCTTTGTAGTC | pNP-132                   |
| KPO-5446 | CCGCACAAAAATCCAACGATTTCC                        | pNP-132                   |
| KPO-5447 | TATGCATCCTAGGCCTATTAGCAGCAATACTTCAACCGGAG       | pNP-132                   |
| KPO-5450 | AGAGGTACCGGTTGTTAACGGAGCTCAATAAGCGAGGAATTC      | pNP-134                   |
| KPO-5451 | GAAATATGCAAGCTGAGTTTTCC                         | pNP-134                   |
| KPO-5452 | AAACTCAGCTTGCATATTTGCTCGGAATTCACAAACCTGTC       | pNP-134                   |

|          |                                                 |               |
|----------|-------------------------------------------------|---------------|
| KPO-5453 | TATGCATCCTAGGCCTATTAGAATGGTCTGATCGGAGGTG        | pNP-134       |
| KPO-5456 | AGAGGTACCGGTTGTTAACGGAACGTA CTTT GATTGGAAAAACC  | pNP-128       |
| KPO-5457 | TATGCATCCTAGGCCTATTACTTCTTTGATACGGTGACTTG       | pNP-128       |
| KPO-5458 | GTTTCAGTTTCCCACTTTATGTGGCTAAAC                  | pNP-129       |
| KPO-5459 | GAAACTGAACTTTTGACAGCTTTGTAGATAG                 | pNP-129       |
| KPO-5534 | GTTTTTATGCATCAAATAATGATGATTAGCCGTCAA G          | pRH-090       |
| KPO-5535 | GTTTTTGCTAGCGTTCGATGCCAAAGCGAGAG                | pRH-090       |
| KPO-5538 | GTTTTTATGCATGTAAACTATTATGTCATCGAAACG            | pRH-092       |
| KPO-5539 | GTTTTTGCTAGCCACCAAGTAAGAGAGTTCAGAG              | pRH-092       |
| KPO-5548 | CCGCCGATACACTGCTTCACGAATACTGAACCTTTTGTCTATC     | pRH-093       |
| KPO-5549 | GATTTTGCCAAATCGTAGGCAAAAAAGAGCGAGCTATTTAAACTC   | pRH-093       |
| KPO-5550 | TTCAGTATTCGTGAAGCAGTGTATCGGCGGTTATTCGGTTC       | pRH-093       |
| KPO-5551 | CTTTTTTGCCTACGATTTGGCAAAATCCTGACTCAGTGC         | pRH-093       |
| KPO-5552 | GAGCGAGCTATTTAAACTCGC                           | VadR 3' probe |
| KPO-5692 | GTTCAAGTAAC TTTAAAGGATCTATCATG                  | pNP-120       |
| KPO-5693 | GTTACTGAACCATTTGTTTTACAAC TG                    | pNP-120       |
| KPO-5696 | GTTACCGTATGAAGGTTAAAGGTTTATCAG                  | pNP-119       |
| KPO-5697 | CATACGGTAACTACGCACATGATTTAATATTG                | pNP-119       |
| KPO-5698 | CAAGGTTTTGTCCTATCTGATGAATTG                     | pNP-168       |
| KPO-5699 | CAAAACCTTGTCTATTCCACACATTA                      | pNP-168       |
| KPO-5700 | GTGGTATCTGATGAATTGTAGATTGG                      | pNP-118       |
| KPO-5701 | GATACCACAAAAGGTTGTCTATTCC                       | pNP-118       |
| KPO-5743 | GAACCAAAAAAGCAGAATACGCATTAC                     | pNP-121       |
| KPO-5744 | CTTTTTTGGTTCATCACTAGACGCTC                      | pNP-121       |
| KPO-5835 | TCGGCTCGTATAATGTGTGGGCGGTTAAACGCAACTAATC        | pLS014        |
| KPO-5836 | GCTCAATCAATCACCGGATCCCACCATTTTATGCTCTAGAAATG    | pLS014        |
| KPO-5837 | TCGGCTCGTATAATGTGTGGGAGAGGTACATAAGAGTTCAAG      | pLS-015       |
| KPO-5838 | GCTCAATCAATCACCGGATCCGATGTTTTAGGGATATAAAAAATAG  | pLS-015       |
| KPO-5841 | TCGGCTCGTATAATGTGTGGATATATTTCCCAAAGTGGGAAATAG   | pLS-016       |
| KPO-5842 | GCTCAATCAATCACCGGATCGGAATTGATATGATGAAGACAGAAA   | pLS-016       |
| KPO-5843 | TCGGCTCGTATAATGTGTGGAGAATCGTTGCTAATCCTGCG       | pLS-017       |
| KPO-5844 | GCTCAATCAATCACCGGATCCAATGCTCAGTCGTTGGGTAT       | pLS-017       |
| KPO-5845 | TCGGCTCGTATAATGTGTGGCCGAACAGTCTATTTTGTATTTC     | pLS-018       |
| KPO-5846 | GCTCAATCAATCACCGGATCCCAATCACATAGTCTGCCTATGC     | pLS-018       |
| KPO-5847 | TCGGCTCGTATAATGTGTGGAATTTGATTATTCTGAATAACCATTAC | pLS-019       |
| KPO-5848 | GCTCAATCAATCACCGGATCGTGACTTGCAACTCCGAGT         | pLS-019       |
| KPO-5849 | TCGGCTCGTATAATGTGTGGGAACTCAGTAGAATCGCTTAGG      | pLS-020       |
| KPO-5850 | GCTCAATCAATCACCGGATCGCACCATTTTACCGTGGTTTAG      | pLS-020       |
| KPO-5981 | GTTTTGTTAAACCTGACAACAGTCTGAC                    | pLS-026       |
| KPO-5982 | GTTTAACAAAACCAACGCCAGCC                         | pLS-026       |
| KPO-5983 | AAACCAACAGTCTGACATTGAACCGAATAAC                 | pLS-027       |
| KPO-5984 | CTGTTGGTTTAAGTCACAAAACCAACGC                    | pLS-027       |
| KPO-5985 | CAGTCATTGAACCGAATAACCGCCG                       | pLS-028       |
| KPO-5986 | TCAATGACTGTTGTCAGGTTTAAGTCAC                    | pLS-028       |
| KPO-6013 | CAACTCTCTACTGTTTCTCC GCTTAGATCTAAAGTTCAAAAAATC  | pRH-099       |
| KPO-6014 | TATGCATCCTAGGCCTATTA GTTCGCCCACTGTTTATCTTG      | pRH-099       |
| KPO-6015 | GGGTCTTTTATGATCTTATA CGTTTTGAAGCAATTTGAGATACC   | pRH-099       |
| KPO-6016 | AGAGGTACCGGTTGTTAACG GTAGTCACTAGGGTTTTGTCATC    | pRH-099       |
| KPO-6472 | TTGTG ACT GAC AAC AGT CTG AC                    | pMS-001       |

|          |                                 |         |
|----------|---------------------------------|---------|
| KPO-6473 | GTTGTCAGTCACAAAACCAACG          | pMS-001 |
| KPO-6474 | CTG ACT GAC ATT GAA CCG AAT AAC | pMS-002 |
| KPO-6475 | GTCAGTCAGGTTTAAGTCACAAAAC       | pMS-002 |

## Supplemental References

1. Shin, J.-H. et al. A multifaceted cellular damage repair and prevention pathway promotes high level tolerance to  $\beta$ -lactam antibiotics. *777375* (2019).
2. Kanehisa, M. & Goto, S. KEGG: kyoto encyclopedia of genes and genomes. *Nucleic Acids Res* **28**, 27-30 (2000).
3. Papenfort, K. et al. A *Vibrio cholerae* autoinducer-receptor pair that controls biofilm formation. *Nat Chem Biol* **13**, 551-557 (2017).
4. Papenfort, K., Forstner, K.U., Cong, J.P., Sharma, C.M. & Bassler, B.L. Differential RNA-seq of *Vibrio cholerae* identifies the VqmR small RNA as a regulator of biofilm formation. *Proc Natl Acad Sci U S A* **112**, E766-75 (2015).
5. Donnell, Z. Regulation of *cqsA* and *cqsS* in *Vibrio cholerae*. (Princeton, NJ : Princeton University, 2015).
6. Frohlich, K.S., Papenfort, K., Fekete, A. & Vogel, J. A small RNA activates CFA synthase by isoform-specific mRNA stabilization. *EMBO J* **32**, 2963-79 (2013).
7. Thelin, K.H. & Taylor, R.K. Toxin-coregulated pilus, but not mannose-sensitive hemagglutinin, is required for colonization by *Vibrio cholerae* O1 El Tor biotype and O139 strains. *Infect Immun* **64**, 2853-6 (1996).
8. Svenningsen, S.L., Tu, K.C. & Bassler, B.L. Gene dosage compensation calibrates four regulatory RNAs to control *Vibrio cholerae* quorum sensing. *EMBO J* **28**, 429-39 (2009).
9. Datsenko, K.A. & Wanner, B.L. One-step inactivation of chromosomal genes in *Escherichia coli* K-12 using PCR products. *Proc Natl Acad Sci U S A* **97**, 6640-5 (2000).
10. de Lorenzo, V. & Timmis, K.N. Analysis and construction of stable phenotypes in gram-negative bacteria with Tn5- and Tn10-derived minitransposons. *Methods Enzymol* **235**, 386-405 (1994).
11. Fried, L., Lassak, J. & Jung, K. A comprehensive toolbox for the rapid construction of lacZ fusion reporters. *J Microbiol Methods* **91**, 537-43 (2012).
12. Herzog, R., Peschek, N., Frohlich, K.S., Schumacher, K. & Papenfort, K. Three autoinducer molecules act in concert to control virulence gene expression in *Vibrio cholerae*. *Nucleic Acids Res* **47**, 3171-3183 (2019).
13. Waters, C.M. & Bassler, B.L. The *Vibrio harveyi* quorum-sensing system uses shared regulatory components to discriminate between multiple autoinducers. *Genes Dev* **20**, 2754-67 (2006).
14. Nadell, C.D., Drescher, K., Wingreen, N.S. & Bassler, B.L. Extracellular matrix structure governs invasion resistance in bacterial biofilms. *ISME J* **9**, 1700-9 (2015).
15. Yan, J., Sharo, A.G., Stone, H.A., Wingreen, N.S. & Bassler, B.L. *Vibrio cholerae* biofilm growth program and architecture revealed by single-cell live imaging. *Proc Natl Acad Sci U S A* **113**, E5337-43 (2016).
16. Skorupski, K. & Taylor, R.K. Positive selection vectors for allelic exchange. *Gene* **169**, 47-52 (1996).
17. Singh, P.K. et al. *Vibrio cholerae* Combines Individual and Collective Sensing to Trigger Biofilm Dispersal. *Curr Biol* **27**, 3359-3366 e7 (2017).
18. Corcoran, C.P. et al. Superfolder GFP reporters validate diverse new mRNA targets of the classic porin regulator, MicF RNA. *Mol Microbiol* **84**, 428-45 (2012).
19. Jahn, M., Vorpahl, C., Hubschmann, T., Harms, H. & Muller, S. Copy number variability of expression plasmids determined by cell sorting and Droplet Digital PCR. *Microb Cell Fact* **15**, 211 (2016).
